# Supplementary material
Source: PubMed Central journal article supplement (PMC6143062)
Supplement: jamapediatr-172-851-s001.pdf [file jamapediatr-172-851-s001.pdf]

## Supplementary Online Content

Poon S, Koren G, Carnevale A, et al. Association of in utero exposure to polybrominated diphenyl ethers with the risk of hypospadias. *JAMA Pediatr*. Published online July 30, 2018. doi:10.1001/jamapediatrics.2018.1492

**eTable.** Median Total Maternal ( $\Sigma$ PBDE) Levels by Completion of Questionnaire in the Hypospadias and Control Groups and by Type of Hypospadias Subtype

This supplementary material has been provided by the authors to give readers additional information about their work.

**eTable.** Median Total Maternal ( $\Sigma$ PBDE) Levels by Completion of Questionnaire in the Hypospadias and Control Groups and by Type of Hypospadias Subtype

| <b>Cohort Characteristics</b>            | <b>Hypospadias</b> | <b>Control</b> |
|------------------------------------------|--------------------|----------------|
| Completed questionnaire                  | 51.4 pg/mg         | 35.8 pg/mg     |
| Did not complete questionnaire           | 52.3 pg/mg         | 37.2 pg/mg     |
| <b>Subtype (<math>\Sigma</math>PBDE)</b> |                    |                |
| Anterior                                 | 51.2 pg/mg         | NA             |
| Middle                                   | 51.6 pg/mg         | NA             |
| Posterior                                | 52.0 pg/mg         | NA             |
| <b>Maternal Characteristics</b>          |                    |                |
| <b>Age, median, y</b>                    |                    |                |
| Completed questionnaire                  | 32.0               | 33.0           |
| Did not complete questionnaire           | 31.6               | 32.7           |
| <b>BMI (kg/m<sup>2</sup>)</b>            |                    |                |
| Completed questionnaire                  | 23.3               | 23.9           |
| Did not complete questionnaire           | 23.5               | 23.6           |
| <b>Smoking during pregnancy, %</b>       |                    |                |
| Completed questionnaire                  | 8.0                | 7.0            |
| Did not complete questionnaire           | 6.0                | 8.0            |
| <b>Drinking during pregnancy, %</b>      |                    |                |
| Completed questionnaire                  | 0                  | 7.0            |
| Did not complete questionnaire           | 3.0                | 8.0            |
| <b>White race/ethnicity, %</b>           |                    |                |
| Completed questionnaire                  | 77.5               | 76.2           |
| Did not complete questionnaire           | 76.2               | 75.1           |
